# Supplementary material for: Specific Recognition of the 5′-Untranslated Region of West Nile Virus Genome by Human Innate Immune System
Source: MDPI journal article supplement (doi:10.3390/v14061282), 2022-06-13
Supplement: s1 [file s1]

# Supplementary Materials: Specific recognition of the 5'-untranslated region of West Nile Virus genome by human innate immune system

Emmanuelle Bignon <sup>1,\*</sup> , Marco Marazzi <sup>2</sup> , Tom Miclot <sup>1,3</sup> , Giampaolo Barone <sup>3</sup> , and Antonio Monari <sup>1,4,\*</sup> 



## Supplementary figures and tables

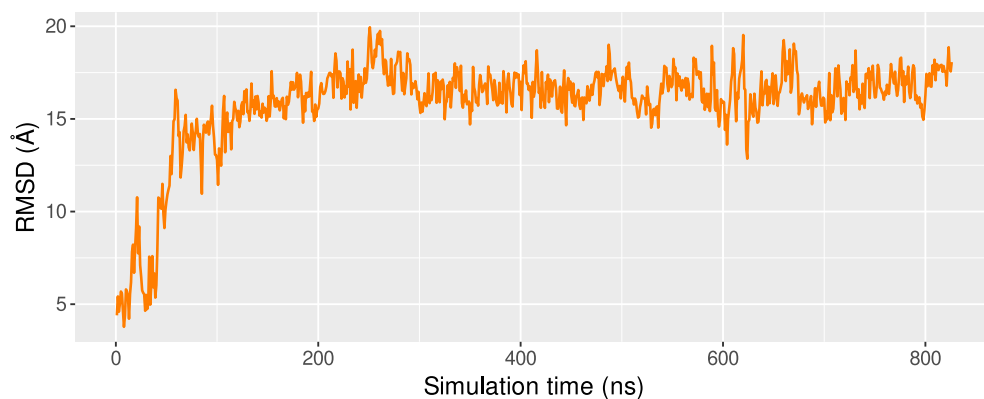

**Figure S1.** Evolution of the RNA root mean square deviation along the MD simulation of the isolated 5' UTR system.

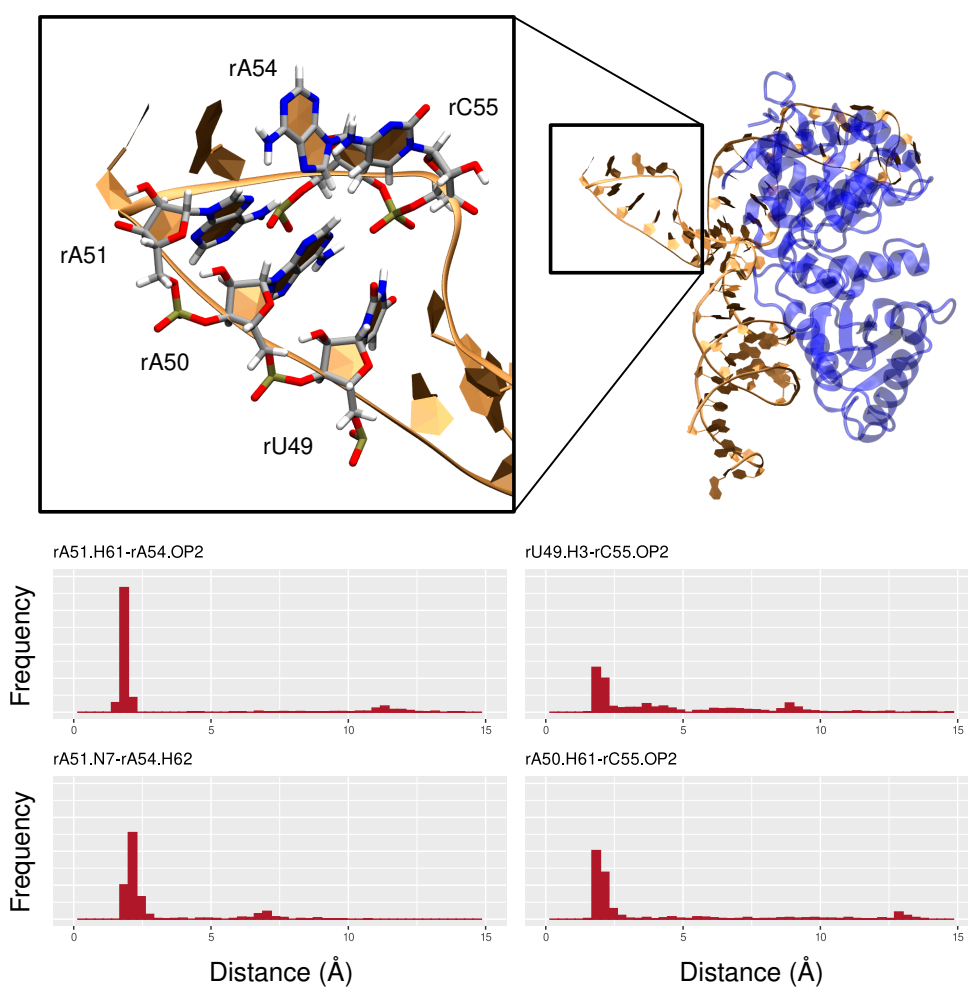

**Figure S2.** Representation of the nucleic acids involved in the major interactions within the lateral RNA loop in the OAS1+RNA complex system simulation (top), and frequencies of the associated distances (bottom).



**Table S1.** Percentage of occurrence of the five major clusters calculated from the isolated RNA and OAS1/RNA complex MD ensembles.

| Cluster | RNA  | RNA+OAS1 |
|---------|------|----------|
| 1       | 75 % | 82 %     |
| 2       | 13 % | 13 %     |
| 3       | 4 %  | 2 %      |
| 4       | 3 %  | 1 %      |
| 5       | 1 %  | 1 %      |
